# Supplementary material for: Physical and mechanical rock properties of a heterogeneous volcano: the case of Mount Unzen, Japan
Source: Copernicus journal article supplement (doi:10.5194/se-12-633-2021), 2021-03-16
Supplement: Supplementary file 1 [file se-12-633-2021-supplement.zip]

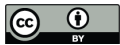

## *Supplement of*

# **Physical and mechanical rock properties of a heterogeneous volcano: the case of Mount Unzen, Japan**

**Jackie E. Kendrick et al.**

*Correspondence to:* Jackie E. Kendrick ([jackie.kendrick@ed.ac.uk](mailto:jackie.kendrick@ed.ac.uk))

- [se-12-633-2021-supplement-title-page.pdf](#)
- Kendrick SI
  - Kendrick et al. Supplementary information\_after review.docx
  - Kendrick et al. supplementary Tables 1-5\_after review.xlsx

The copyright of individual parts of the supplement might differ from the article licence.
